# Supplementary material
Source: MDPI journal article supplement (https://www.mdpi.com/2297-8739/8/5/67)
Supplement: s1 [file s1]

# Rapid Production of PDMS Microdevices for Electrodriven Separations and Microfluidics by 3D-Printed Scaffold Removal

Alena Šustková, Klára Konderlová †, Ester Drastíková †, Stefan Sützl ‡, Lenka Hárendarčíková and Jan Petr \*

Department of Analytical Chemistry, Faculty of Science, Palacký University Olomouc, 17. listopadu 12, 77146 Olomouc, Czech Republic; alenasustkova94@seznam.cz (A.Š.); konderlova.k@email.cz (K.K.); drastikovaester@seznam.cz (E.D.); stefan.suetzl@aon.at (S.S.); harendarcikova.lenka@gmail.com (L.H.)

\* Correspondence: jan.petr@upol.cz; Tel.: +42-0585-634-416

† These authors contributed equally.

‡ On leave from Vienna University of Technology, Resselgasse 38, A-1040 Vienna, Austria

**Citation:** Šustková, A.; Konderlová, K.; Drastíková, E.; Sützl, S.; Hárendarčíková, L.; Petr, J. Rapid Production of PDMS Microdevices for Electrodriven Separations and Microfluidics by 3D-Printed Scaffold Removal. *Separations* **2021**, *8*, 67. <https://doi.org/10.3390/separations8050067>

Academic Editor: Marián Masár

Received: 23 February 2021

Accepted: 12 May 2021

Published: 14 May 2021

**Publisher's Note:** MDPI stays neutral with regard to jurisdictional claims in published maps and institutional affiliations.

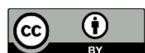

**Copyright:** © 2021 by the authors. Licensee MDPI, Basel, Switzerland. This article is an open access article distributed under the terms and conditions of the Creative Commons Attribution (CC BY) license (<http://creativecommons.org/licenses/by/4.0/>).

## 1. Description of supporting files

video.mp4: production of droplets in the “monolithic” device

box.stl: box for the production “monolithic” devices

channel1M.stl: straight channel for production of “monolithic” devices

channel2M.stl: T-channel for production of “monolithic” devices

channel3M.stl: cross channel for production of “monolithic” devices

channel1B.stl: straight channel for production of “bonded” devices

channel2B.stl: T-channel for production of “bonded” devices

channel3B.stl: cross channel for production of “bonded” devices

## 2. Supporting figures

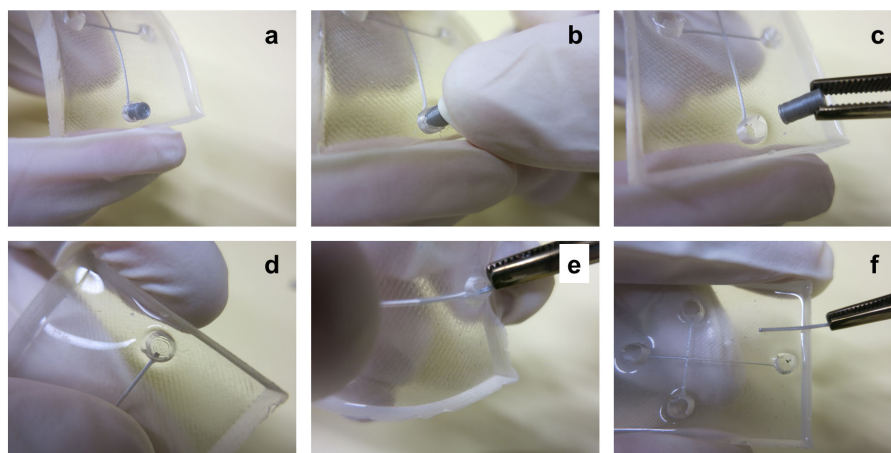

**Figure S1.** Removal of 3D printed structures in “monolithic” PDMS-microdevice. The time sequence is in the alphabetical order.

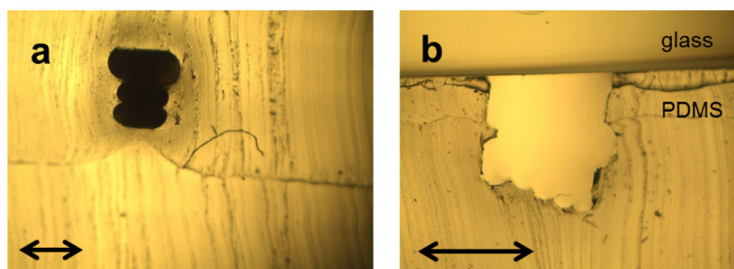

**Figure S2.** Cross-section of PDMS-based microdevices channels formed by 3D-printed scaffolds removal; (a) “monolithic” microdevices; (b) “bonded” microdevices; size of the arrow is 1.0 mm.

### Floating method

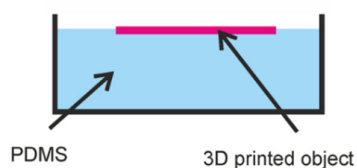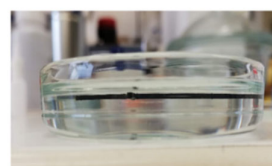

### Adhesion method

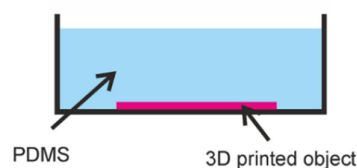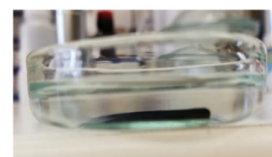

**Figure S3.** “Stamping” the 3D-printed scaffolds in PDMS.

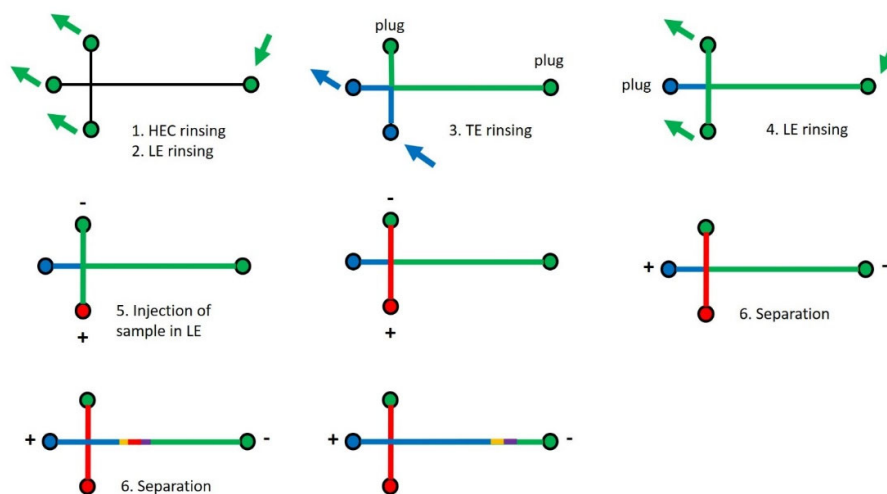

**Figure S4.** Procedure of the isotachopheresis separation on the microdevices; the time sequence is in the alphabetical order; HEC represents  $1 \text{ mg.mL}^{-1}$  2-hydroxyethylcellulose in deionized water; LE was  $10 \text{ mmol.L}^{-1}$  HCl titrated by histidine to pH 6.0; TE was  $10 \text{ mmol.L}^{-1}$  MES titrated by histidine to pH 6.0; voltage of 200 V was used.

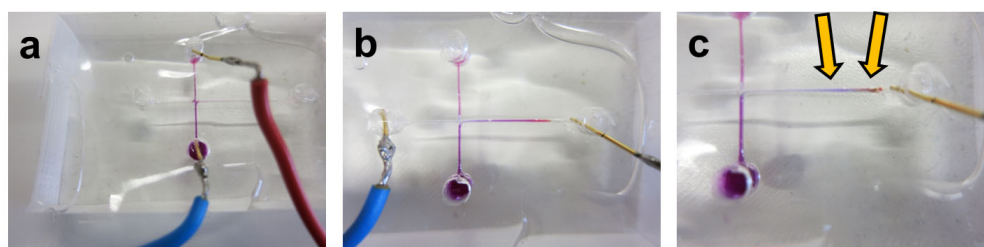

**Figure 5.** Example of isotachopheresis on “monolithic” PDMS-microdevice; (a) Injection; (b) Separation; (c) Final separation of the dyes; the separated dyes are marked by arrows.
